# Supplementary material
Source: PubMed Central journal article supplement (PMC2972927)
Supplement: 1004949107_pnas.201004949SI.pdf [file 1004949107_pnas.201004949SI.pdf]

# Supporting Information

Xia et al. 10.1073/pnas.1004949107

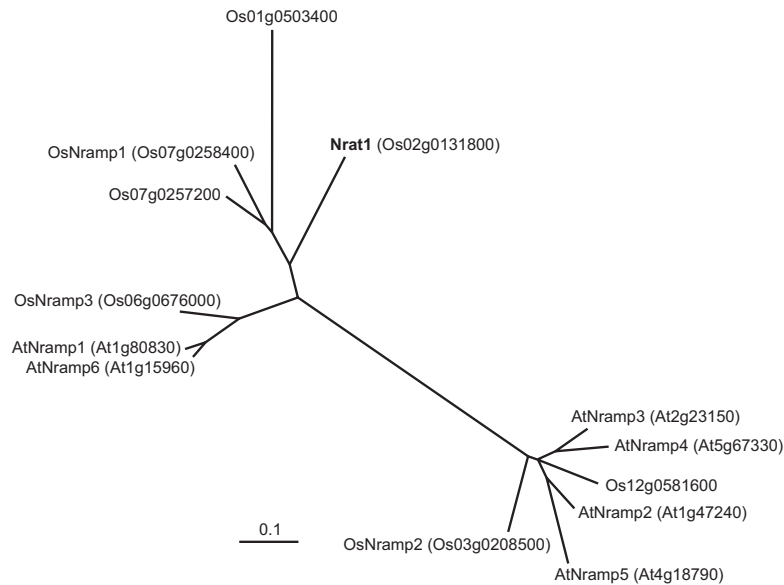

**Fig. S1.** Phylogenetic tree of Nramp proteins in rice (*Os*-) and *Arabidopsis* (*At*-). The 0.1 scale shows substitution distance.

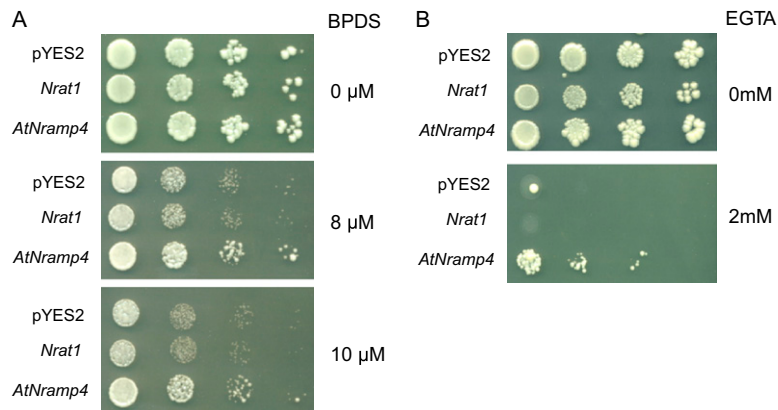

**Fig. S2.** Transport activity for iron and manganese in yeast. Yeast mutant (*fet3fet4* or *smf1*) transformed with the empty vector pYES2, *Nrat1*, or *AtNramp4* were spotted on synthetic medium at serial dilutions (OD<sub>600</sub>, 0.2, 0.02, 0.002, and 0.0002). (A) Complementation of iron uptake. Transformed *fet3fet4* were grown on a medium (pH 5.5) buffered with 50 mM Mes in the presence or absence of BPDS. (B) Complementation of manganese uptake. Transformed *smf1* were grown on a medium (pH 6.0) buffered with 50 mM Mes in the presence or absence of 2 mM EGTA. The plates were incubated at 30 °C for 5 d.

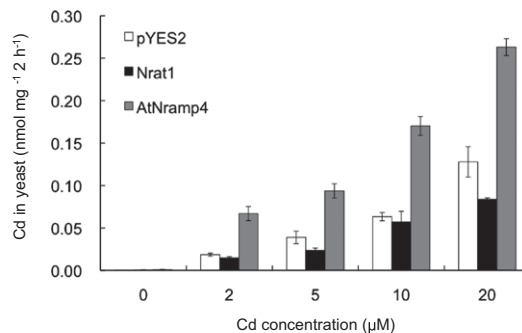

**Fig. S3.** Transport activity of *Nrat1* for cadmium. Yeast strain (BY4741) transformed with empty vector pYES2, *Nrat1*, or *AtNramp4* were exposed to a solution (pH 4.6) containing 2, 5, 10, or 20 μM CdCl<sub>2</sub> for 2 h. The Cd concentration was determined by atomic absorption spectrophotometer. Data are means ± SD of three biological replicates.

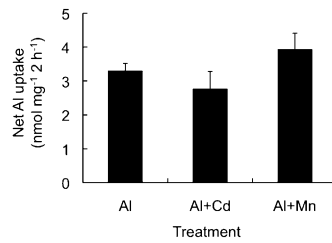

**Fig. S4.** Competition experiments in yeast. Yeast cells expressing *Nrat1* were exposed to a solution with or without equal concentration of Cd or Mn in the presence of 50  $\mu$ M aluminum (Al) for 2 h. The concentration of Al in the digest solution was determined by atomic absorption spectrophotometer. Data are means  $\pm$  SD of three biological replicates.

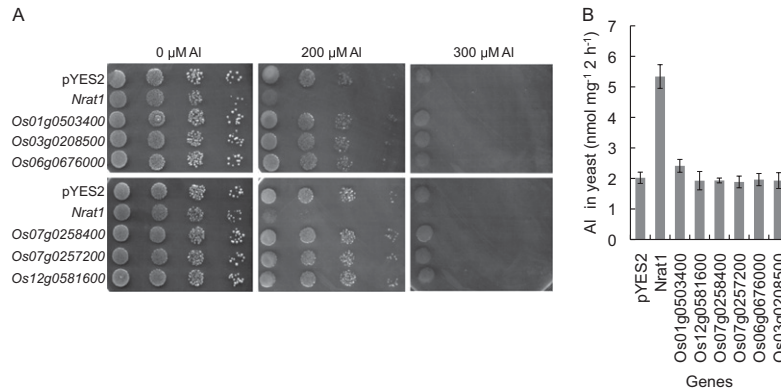

**Fig. S5.** Effect of expression of rice *Nramp* genes on Al sensitivity in yeast. (A) Yeast cells (BY4741) were transformed with the empty vector pYES2, *Nrat1*, *Os01g0503400*, *Os03g0208500*, *Os06g0676000*, *Os07g0258400*, *Os07g0257200*, and *Os12g0581600*. The transformed cells were spotted on the LPM-ura medium (pH 4.2) buffered with 5 mM succinic acid with or without AlCl<sub>3</sub> at serial dilutions (OD<sub>600</sub>: 0.2, 0.02, 0.002, and 0.0002 from left to right). The plates were incubated at 30°C for 3 d. (B) Al uptake by yeast expressing different rice *Nramp* genes. Yeast cells expressing different rice *Nramp* genes were exposed to a solution containing 30  $\mu$ M Al (pH 4.2) for 2 h. The concentration of Al in the digest solution was determined by atomic absorption spectrophotometer. Data are means  $\pm$  SD of three biological replicates.

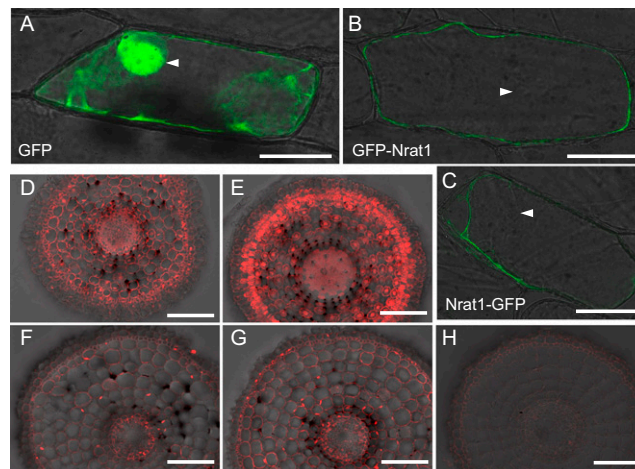

**Fig. S6.** Localization of *Nrat1*. (A–C) Subcellular localization of *Nrat1*. GFP alone (A), GFP fused with *Nrat1* at the N terminal (B), or the C terminal (C) was expressed in the epidermal cells of onion. Plasmolysis was induced by 1 M mannitol. Arrowhead indicates the nucleus. (D–H) Immunostaining of GFP in the GFP transgenic rice under the control of *Nrat1* promoter or wild-type. (D and E) Root tip without Al (D) or with Al treatment (E); (F and G) root segment at 15 mm without (F) or with Al (G) treatment. (H) wild-type root. (Scale bars in A–H, 100  $\mu$ m.)

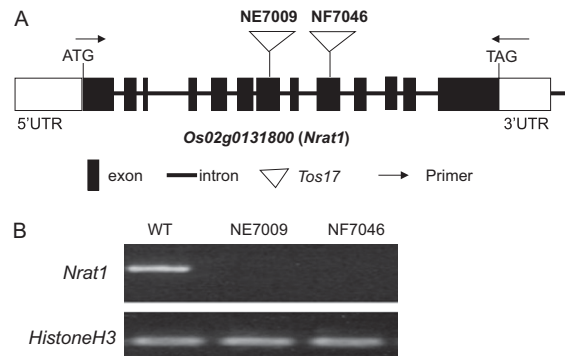

**Fig. 57.** Tos-17 insertion lines of *Nrat1*. (A) Insertion position of two Tos17 insertion lines (NE7009 and NF7046) indicated by triangles. (B) Expression of *Nrat1* mRNA in wild-type rice (WT), NE7009, and NF7046. The expression was examined by RT-PCR.

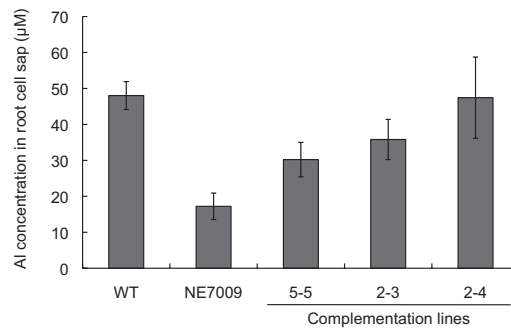

**Fig. 58.** Concentration of Al in the root-cell sap of complementation lines. Rice *Nrat1* gene was introduced into a Tos-17 insertion line (NE7009) by *Agrobacterium*-mediated transformation. Wild-type rice (WT), NE7009 and three independent transgenic lines were exposed to a solution containing 30 μM Al for 8 h. The root-cell saps were extracted by a frozen-thawed method and determined with atomic absorption spectrophotometer. Data are means ± SD of three biological replicates.

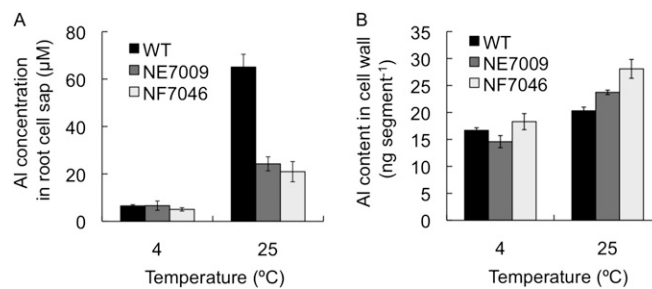

**Fig. 59.** Effect of temperature on Al uptake. (A) Al in the root-cell sap. (B) Al content in the cell wall. Wild-type rice and two knockout lines were exposed to 30 μM Al (pH 4.2) for 8 h. The root tips (0–1 cm) were excised for determination. Data are means ± SD of three biological replicates.

**Table S1. Concentration of cations in the roots and shoots of wild-type rice (WT) and mutant (NE7009)**

|                                     | Shoots      |             | Roots         |              |
|-------------------------------------|-------------|-------------|---------------|--------------|
|                                     | WT          | NE7009      | WT            | NE7009       |
| Macrocations (mg kg <sup>-1</sup> ) |             |             |               |              |
| K                                   | 28.5 ± 0.42 | 28.0 ± 0.89 | 18.2 ± 0.54   | 17.2 ± 0.76  |
| Ca                                  | 2.18 ± 0.23 | 2.07 ± 0.08 | 0.58 ± 0.01   | 0.61 ± 0.03  |
| Mg                                  | 2.55 ± 0.11 | 2.45 ± 0.02 | 1.43 ± 0.17   | 1.63 ± 0.19  |
| Microcations (µg kg <sup>-1</sup> ) |             |             |               |              |
| Fe                                  | 83.1 ± 9.34 | 81.7 ± 2.08 | 191.0 ± 38.13 | 220.7 ± 4.66 |
| Cu                                  | 14.6 ± 0.43 | 14.8 ± 0.20 | 204.4 ± 23.5  | 253.1 ± 26.5 |
| Zn                                  | 33.3 ± 2.57 | 32.1 ± 0.85 | 54.8 ± 4.77   | 66.0 ± 7.2   |
| Mn                                  | 99.2 ± 10.9 | 100.9 ± 4.0 | —             | —            |

The plants were cultured in half-strength Kimura B nutrient solution for 1 mo. The concentration of cations was determined by atomic absorption spectrophotometer after digestion with HNO<sub>3</sub>. Data are means ± SD of three biological replicates. —, not detectable.
